# Supplementary material for: Degradation of Carbamazepine by HF-Free-Synthesized MIL-101(Cr)@Anatase TiO2 Composite under UV-A Irradiation: Degradation Mechanism, Wastewater Matrix Effect, and Degradation Pathway
Source: MDPI journal article supplement (doi:10.3390/w14233964), 2022-12-05
Supplement: s1 [file s1]

## **Support Information**

**Degradation of Carbamazepine by HF-Free-Synthesized MIL-101(Cr)@Anatase TiO<sub>2</sub> Composite under UV-A irradiation:**

**Degradation mechanism, wastewater matrix effect and degradation pathway**

J. W. Goh<sup>1</sup>, Y. Xiong<sup>1</sup>, W. Wu<sup>2</sup>, Z. Huang<sup>2</sup>, S. L. Ong<sup>1</sup> and J. Y. Hu<sup>1\*</sup>

<sup>1</sup>Department of Civil & Environmental Engineering, National University of Singapore, 1 Engineering Drive 2, Singapore 117576

<sup>2</sup>Singapore Institute of Manufacturing Technology, 2 Fusionopolis Way #08-04 Innovis Singapore 138634

\*Corresponding author: Email: [hujiangyong@nus.edu.sg](mailto:hujiangyong@nus.edu.sg)

**Text. S1.** Chemicals & reagents

**Table. S1.** Types of APIs identified in pharmaceutical effluents and their corresponding concentrations

**Table. S2.** Surrogate parameters of pharmaceutical wastewater samples

**Table. S3.** Total alkalinity as  $\text{CaCO}_3$  (mg/L) of pharmaceutical wastewater samples

**Table. S4.**  $\text{Cl}^-$  and  $\text{SO}_4^{2-}$  in pharmaceutical wastewater samples

**Table. S5.** GC/MS temperature program (DB 1301)

**Table. S6.** GC/MS temperature program (Mega-Wax)

**Table. S7.** Weight % & Atomic % of each element based on TEM EDS Point Detection Location

**Table. S8.** Common chemical states of Cr and corresponding binding energy

**Table. S9.** Isotherm & kinetic model parameters for adsorption of CBZ onto MIL-101(Cr)

**Table. S10.** Adsorption kinetic parameters for  $\text{TiO}_2$ : MIL-101(Cr) composites with varied ratio

**Table. S11.** Pseudo-steady state  $\bullet\text{OH}$  concentration  $[\text{OH}]_{\text{ss}}$  due to  $\text{TiO}_2$ :MIL composites with varied ratio

**Table. S12.** Rate constants for hydroxyl radical trapping ( $k_{\text{rxn}/\bullet\text{OH}}$ )

**Table. S13.** Redox potentials for oxidizing species

**Table. S14.** Rate of reaction of  $\bullet\text{OH}$  radicals with selected amides in aqueous solution

**Table. S15.** Possible intermediates of CBZ with their elemental composition & structure

**Table. S16.** Intermediates identified due to various quenchers in excess at 50-minute reaction

**Figure S1.** GC/MS spectrum of pharmaceutical wastewater samples PWS 1 & PWS 2 using (A) DB1301, (C) Mega-Wax with MS spectrum of (B) Tetrahydrofuran & (D) N, N Dimethyl-Formamide

**Figure S2.** (A) Calibration curve & (B) Absorbance spectrum of CBZ by HPLC-DAD at 285nm wavelength

**Figure S3.** Schematic diagram of UV-A/LED photocatalytic setup

**Figure S4.** XPS patterns of MIL-101(Cr)@TiO<sub>2</sub> (Ti2p)

**Figure S5.** XPS patterns of MIL-101(Cr)@TiO<sub>2</sub> (O1s)

**Figure S6.** XPS patterns of MIL-101(Cr)@TiO<sub>2</sub> (Cr2p)

**Figure S7.** XPS patterns of MIL-101(Cr)@TiO<sub>2</sub> (C1s)

**Figure S8.** (A) Adsorption isotherms (B) Adsorption kinetics of CBZ on MIL-101(Cr)

**Figure S9.** Determination of Cr concentration using ICP-OES

**Figure S10.** Absorbance spectra of MIL-101(Cr), MIL-101(Cr)@TiO<sub>2</sub> and TiO<sub>2</sub>

**Figure S11.** (A) Degradation of DMF using MIL-101(Cr)@TiO<sub>2</sub> with the corresponding MS Spectrum (B) GC/MS spectrum at different time intervals with the presence of both DMF & N-Methyl-Formamide

**Figure S12.** Transformation of tetrahydrofuran to 2-hydroxytetrahydrofuran to butyrolactone

**Figure S13.** (A) Degradation of THF using MIL-101(Cr)@TiO<sub>2</sub> (B) GC/MS Spectrum with the corresponding MS Spectrum

**Figure S14.** Absorbance spectrum of pharmaceutical wastewater samples PWS 1 & PWS 2 with different dilution factors

**Figure S15.** MS chromatography of CBZ & its intermediates: (A)  $m/z = 237$  (B)  $m/z = 253$  (C)  $m/z = 251$  (D)  $m/z = 271$  (E)  $m/z = 120$  (F)  $m/z = 223$  (G)  $m/z = 267$  (H)  $m/z = 180$  (I)  $m/z = 196$  (J)  $m/z = 225$

**Figure S16.** MS spectrum of CBZ and its intermediates

**Figure S17.** Time-profiles of CBZ intermediates for MIL-101(Cr)@TiO<sub>2</sub> composite with UV-A irradiation (Max-Normalized)

**Text. S1.** Chemicals & reagents

Carbamazepine ( $C_{15}H_{12}N_2O$ , > 99%), tert-butanol ( $C_4H_{10}O$ ,  $\geq 99.5\%$ ), potassium iodide (KI,  $\geq 99\%$ ), sodium azide ( $NaN_3$ ,  $\geq 99.5\%$ ), *p*-benzoquinone ( $C_6H_4O_2$ ,  $\geq 98\%$ ), silver nitrate ( $AgNO_3$ ,  $\geq 99\%$ ), DMPO ( $C_6H_{11}NO$ ,  $\geq 97\%$ ), ethanol ( $C_2H_6O$ ,  $\geq 99.8\%$ ), chromium (III) nitrate nonahydrate ( $Cr(NO_3)_3 \cdot 9H_2O$ , 99%), terephthalic acid ( $H_2BDC$ , 98%), N,N-dimethylformamide ( $C_3H_7NO$ , 99.8%), titanium (IV) butoxide (TBOT, 97%), sodium hydroxide (NaOH,  $\geq 98\%$ ), sulfuric acid ( $H_2SO_4$ , > 99%), sodium chloride ( $\geq 99.5\%$ ), sodium sulfate (> 99%), sodium bicarbonate ( $NaHCO_3$ , > 99%), sodium carbonate ( $Na_2CO_3$ ,  $\geq 99.5\%$ ) were purchased from Sigma-Aldrich. All solutions used were made with ultrapure water with a resistivity of > 18M $\Omega$  from a Synergy 185 water purification system (Millipore, USA).

**Table. S1.** Types of APIs identified in pharmaceutical effluents and their corresponding concentrations

| Country | Pharmaceuticals Identified | Concentration        | References |
|---------|----------------------------|----------------------|------------|
| Korea   | Carbamazepine              | 0.001mg/L            | [1]        |
|         | Acetylsalicylic Acid       | 0.551mg/L            |            |
|         | Diclofenac                 | 0.181mg/L            |            |
|         | Lincomycin                 | 0.114mg/L            |            |
|         | Sulfamethazine             | 0.166mg/L            |            |
| Israel  | Carbamazepine              | 0.84 $\pm$ 0.19mg/L  | [2]        |
|         | Venlafaxine                | 11.72 $\pm$ 2.2mg/L  |            |
| India   | Carbamazepine              | 2.21 $\pm$ 0.1 mg/L  | [3]        |
|         | Oxcarbazepine              | 5.54 $\pm$ 0.19 mg/L |            |

**Table. S2.** Surrogate parameters of pharmaceutical wastewater samples

| Parameters                       | PWS 1              |          | PWS 2                |            |
|----------------------------------|--------------------|----------|----------------------|------------|
|                                  | Min – Max          | Average  | Min – Max            | Average    |
| pH                               | 10.50 –<br>10.80   | 10.70    | 11.30 – 11.70        | 11.58      |
| COD (mg/L)                       | 70,000 –<br>93,000 | 86,742   | 130,000 –<br>210,000 | 170,341    |
| TOC (mg/L)                       | 16,100 –<br>25,700 | 20,149   | 68,700 –<br>90,100   | 78,011     |
| Total Dissolved Solids<br>(mg/L) | 6,000 –<br>6,600   | 6,287.88 | 85,000 –<br>125,000  | 109,024.13 |

**Table. S3.** Total alkalinity as CaCO<sub>3</sub> (mg/L) of pharmaceutical wastewater samples

| Parameters                                      | PWS 1            |          | PWS 2              |           |
|-------------------------------------------------|------------------|----------|--------------------|-----------|
|                                                 | Min – Max        | Average  | Min – Max          | Average   |
| Total Alkalinity as<br>CaCO <sub>3</sub> (mg/L) | 1,000 –<br>1,130 | 1,098.56 | 43,200 –<br>44,600 | 43,839.11 |

**Table. S4.** Cl<sup>-</sup> and SO<sub>4</sub><sup>2-</sup> in pharmaceutical wastewater samples

| Ion species                          | PWS 1         |          | PWS 2           |           |
|--------------------------------------|---------------|----------|-----------------|-----------|
|                                      | Range         | Average  | Range           | Average   |
| Cl <sup>-</sup> , mg/L               | 2,900 – 3,400 | 3,160.46 | 26,000 – 45,600 | 31,163.37 |
| SO <sub>4</sub> <sup>2-</sup> , mg/L | -             | -        | 1,200 – 2,000   | 1,551.38  |

**Table. S5.** GC/MS temperature program (DB 1301)

|                                                                                                              |                   |                            |
|--------------------------------------------------------------------------------------------------------------|-------------------|----------------------------|
| GC-MS system (Model: GCMS-QP2010, Shimadzu, Japan)                                                           |                   |                            |
| <b>GC-Column:</b> DB1301 column (Low to mid polarity; Length (30cm) x Diameter (0.24mm I.D) x Film (0.25µm)) |                   |                            |
| a. Temperature                                                                                               | GC Injector       | 250°C                      |
|                                                                                                              | Oven Initial      | 35°C (4 min holding)       |
|                                                                                                              | Oven Ramping Rate | 4°C per min for a total of |
|                                                                                                              | Oven Maximum      | 200°C for 10 min holding   |
| b. Flow rate                                                                                                 | Column (He)       | 1.2 mL/min                 |
|                                                                                                              | Split             | 12 mL/min                  |
| c. MS System                                                                                                 | Ionization mode   | EI (70eV)                  |
|                                                                                                              | Ion Source Temp.  | 200°C                      |
|                                                                                                              | Interface Temp.   | 200°C                      |
|                                                                                                              | TIC Scan Range    | 35 – 250 m/z               |
|                                                                                                              | Threshold         | 100                        |

**Table. S6.** GC/MS temperature program (Mega-Wax)

|                                                                                                   |                   |                                       |
|---------------------------------------------------------------------------------------------------|-------------------|---------------------------------------|
| GC-MS system (Model: GCMS-QP2010, Shimadzu, Japan)                                                |                   |                                       |
| <b>GC-Column:</b> Megawax (High Polarity; Length (30cm) x Diameter (0.25 mm I.D) x Film (0.25µm)) |                   |                                       |
| a. Temperature                                                                                    | GC Injector       | 230°C                                 |
|                                                                                                   | Oven Initial      | 40°C (2 min holding)                  |
|                                                                                                   | Oven Ramping Rate | 15°C per min for a total of 13.33 min |
|                                                                                                   | Oven Maximum      | 200°C for 10 min holding              |
| b. Flow rate                                                                                      | Column (He)       | 1.2 mL/min                            |
|                                                                                                   | Split             | 12 mL/min                             |
| c. MS System                                                                                      | Ionization mode   | EI (70eV)                             |
|                                                                                                   | Ion Source Temp.  | 230°C                                 |
|                                                                                                   | Interface Temp.   | 230°C                                 |
|                                                                                                   | TIC Scan Range    | 30 – 300 m/z                          |
|                                                                                                   | Threshold         | 0                                     |

**Table. S7.** Weight % & Atomic % of each element based on TEM EDS Point Detection

Location

| MIL-101(Cr)@Ti<br>O <sub>2</sub><br>Composite | Titanium (Ti) |          | Oxygen (O) |          | Chromium (Cr) |          |
|-----------------------------------------------|---------------|----------|------------|----------|---------------|----------|
|                                               | Weight %      | Atomic % | Weight %   | Atomic % | Weight %      | Atomic % |
| Location 2                                    | 0.38          | 0.16     | 72.41      | 89.49    | 27.19         | 10.34    |
| Location 4                                    | 27.85         | 12.69    | 60.34      | 82.34    | 11.80         | 4.95     |
| Location 5                                    | 15.86         | 6.94     | 65.18      | 85.41    | 18.95         | 7.64     |

**Table. S8.** Common chemical states of Cr and corresponding binding energy

| Chemical State | Binding Energy Cr2p <sub>3/2</sub> / eV |
|----------------|-----------------------------------------|
| Cr Metal       | 574.3                                   |
| Cr (III) oxide | 576                                     |
| Cr (VI) oxide  | 579                                     |

**Table. S9.** Isotherm & kinetic model parameters for adsorption of CBZ onto MIL-101(Cr)

| Langmuir Adsorption Isotherm                     |                                     |                | Freundlich Adsorption Isotherm                    |                              |                |
|--------------------------------------------------|-------------------------------------|----------------|---------------------------------------------------|------------------------------|----------------|
| Q <sub>m</sub> (mg/g)                            | K <sub>L</sub><br>(L/mg)            | R <sup>2</sup> | K <sub>F</sub><br>(mg/g)(L/g) <sup>n</sup>        | n                            | R <sup>2</sup> |
| 18.195                                           | 0.0306                              | 0.9969         | 0.640                                             | 1.2138                       | 0.9975         |
| Pseudo 1 <sup>st</sup> Order Kinetic (Lagergren) |                                     |                | Pseudo 2 <sup>nd</sup> Order Kinetic (Ho & Mckay) |                              |                |
| q <sub>e</sub> (mg/g)                            | k <sub>1</sub> (min <sup>-1</sup> ) | R <sup>2</sup> | q <sub>e</sub> (mg/g)                             | k <sub>2</sub><br>(g/mg.min) | R <sup>2</sup> |
| 3.908                                            | 0.3209                              | 0.9452         | 4.424                                             | 0.0934                       | 0.9898         |

**Table. S10.** Adsorption kinetic parameters for varied percentage of TiO<sub>2</sub>: MIL-101(Cr) composite

| X% TiO <sub>2</sub> :<br>MIL-<br>101(Cr) | Pseudo 1 <sup>st</sup> Order Kinetic<br>(Lagergren) |                                        |                | Pseudo 2 <sup>nd</sup> Order Kinetic (Ho & Mckay) |                              |                |
|------------------------------------------|-----------------------------------------------------|----------------------------------------|----------------|---------------------------------------------------|------------------------------|----------------|
|                                          | q <sub>e</sub><br>(mg/g)                            | k <sub>1</sub><br>(min <sup>-1</sup> ) | R <sup>2</sup> | q <sub>e</sub> (mg/g)                             | k <sub>2</sub><br>(g/mg.min) | R <sup>2</sup> |
| MIL-101(Cr)                              | 3.908                                               | 0.3210                                 | 0.9521         | 4.424                                             | 0.0934                       | 0.9798         |
| 2.29%                                    | 2.515                                               | 0.2675                                 | 0.9929         | 2.917                                             | 0.1069                       | 0.9930         |
| 4.58%                                    | 2.566                                               | 0.4237                                 | 0.9397         | 2.945                                             | 0.1282                       | 0.9598         |
| 9.17%                                    | 1.754                                               | 0.4237                                 | 0.9619         | 1.965                                             | 0.2874                       | 0.9551         |
| 13.75%                                   | 1.869                                               | 0.1542                                 | 0.9827         | 2.354                                             | 0.0617                       | 0.9843         |
| 18.33%                                   | 1.910                                               | 0.1626                                 | 0.9452         | 2.490                                             | 0.0383                       | 0.9661         |



**Table. S11.** Pseudo-steady state  $\bullet\text{OH}$  concentration  $[\text{OH}]_{\text{ss}}$  by  $\text{TiO}_2\text{:MIL}$  composites with varied ratio

| <b>X% <math>\text{TiO}_2\text{: MIL-101}(\text{Cr})</math></b> | <b><math>[\bullet\text{OH}]_{\text{ss}}</math></b> | <b><math>\text{R}^2</math></b> |
|----------------------------------------------------------------|----------------------------------------------------|--------------------------------|
| 2.29%                                                          | 1.12428E-13                                        | 0.8880                         |
| 4.58%                                                          | 2.7733E-13                                         | 0.9980                         |
| 9.17%                                                          | 4.27788E-13                                        | 0.9696                         |
| 13.75%                                                         | 4.01515E-13                                        | 0.9865                         |
| 18.33%                                                         | 3.80781E-13                                        | 0.9926                         |

**Table. S12.** Rate constants for hydroxyl radical trapping ( $k_{\text{rxn}/\bullet\text{OH}}$ )

| <b>Spin Trap</b>  | <b><math>K_{\text{rxn}/\bullet\text{OH}} (10^9)</math></b> | <b>References</b> |
|-------------------|------------------------------------------------------------|-------------------|
| Terephthalic Acid | $4.4 \pm 0.1$                                              | [4]               |
| DMPO              | 3.4                                                        | [5]               |
| Ethanol/Methanol  | 1.2 – 2.8                                                  | [6], [7]          |
| Tert-Butanol      | 0.38-0.76                                                  | [8]               |
| pCBA              | 5.0                                                        | [9]               |

**Table. S13.** Redox potentials for oxidizing species

| <b>Redox Pair</b>                                   | <b><math>\text{E}^{\circ} (\text{V})</math> vs. NHE</b> | <b>Reference</b> |
|-----------------------------------------------------|---------------------------------------------------------|------------------|
| $\text{SO}_4^{\bullet-}/\text{SO}_4^{2-}$           | 2.43                                                    | [10]             |
| $\text{Cl}_2^{\bullet-}/2\text{Cl}^-$               | 2.10                                                    | [11]             |
| $\text{CO}_3^{\bullet-}, \text{H}^+/\text{HCO}_3^-$ | 1.78                                                    | [12]             |

**Table. S14.** Rate of reaction of •OH radicals with selected amides in aqueous solution

| Amides                        | $k_{\bullet\text{OH}}$ ( $\text{M}^{-1} \text{s}^{-1}$ ) |
|-------------------------------|----------------------------------------------------------|
| Formamide                     | $5.0 \times 10^8$                                        |
| N-Methyl-Formamide (NMF)      | $1.2 \times 10^9$                                        |
| N, N Dimethyl-Formamide (DMF) | $1.7 \times 10^9$                                        |
| Dimethyl-Acetamide (DMAc)     | $3.5 \times 10^9$                                        |
| Acetamide                     | $1.9 \times 10^8$                                        |

**Table. S15.** Possible intermediates of CBZ with their elemental composition & structure

| m/z<br>[M + H] <sup>+</sup> | Name of Products | Elemental Composition                            | Structure | m/z<br>[M + H] <sup>+</sup> | Name of Products | Elemental Composition                            | Structure |
|-----------------------------|------------------|--------------------------------------------------|-----------|-----------------------------|------------------|--------------------------------------------------|-----------|
| 237                         | CBZ              | $\text{C}_{15}\text{H}_{12}\text{N}_2\text{O}$   |           | 253                         | P252             | $\text{C}_{15}\text{H}_{12}\text{N}_2\text{O}_2$ |           |
| 180                         | Acridine         | $\text{C}_{13}\text{H}_9\text{N}$                |           | 196                         | Acridone /P195   | $\text{C}_{13}\text{H}_9\text{NO}$               |           |
| 225                         | P224             | $\text{C}_{14}\text{H}_{12}\text{N}_2\text{O}$   |           | 223                         | P222             | $\text{C}_{14}\text{H}_{10}\text{N}_2\text{O}$   |           |
| 271                         | Trans-CBZ        | $\text{C}_{15}\text{H}_{14}\text{N}_2\text{O}_3$ |           | 267                         | TP266/B QD       | $\text{C}_{15}\text{H}_{10}\text{N}_2\text{O}_3$ |           |
| 120                         | P119             | $\text{C}_6\text{H}_5\text{N}_3$                 |           | 251                         | BQM/P250         | $\text{C}_{15}\text{H}_{10}\text{N}_2\text{O}_2$ |           |
| 208                         | P207             | $\text{C}_{14}\text{H}_{10}\text{NO}$            |           |                             |                  |                                                  |           |

**Table. S16.** Intermediates identified due to various quenchers in excess at 50-minute reaction

| Conditions | Quenchers                     | Intermediates Formed                                     |
|------------|-------------------------------|----------------------------------------------------------|
| I          | Blank                         | $m/z = 237, 253, 251, 271, 180, 196, 120, 223, 225, 267$ |
| II         | KI ( $h^+$ )                  | $m/z = 237$                                              |
| III        | BQ ( $O_2^{\bullet-}$ )       | $m/z = 237, 253, 208$                                    |
| IV         | Tert-Butanol ( $\bullet OH$ ) | $m/z = 237, 253, 251, 271, 180, 196, 223, 267$           |

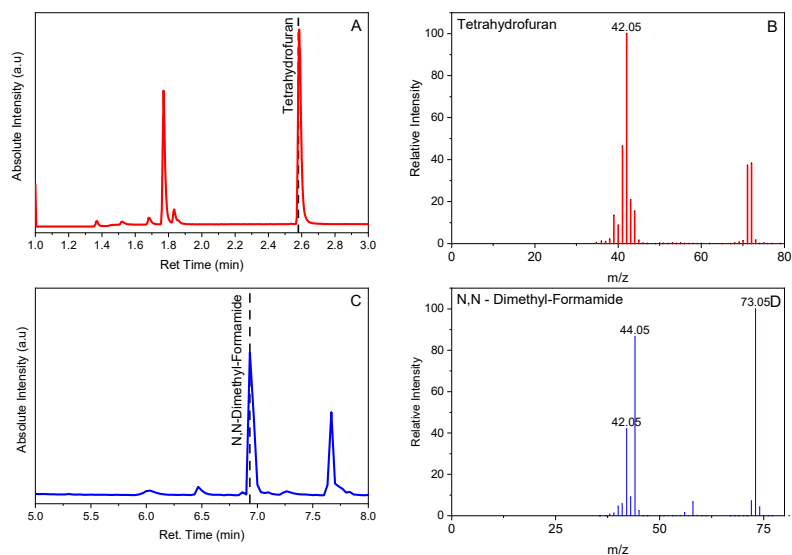

**Figure S1.** GC/MS spectrum of pharmaceutical wastewater samples PWS 1 & PWS 2 using (A) DB1301, (C) Mega-Wax with MS spectrum of (B) Tetrahydrofuran & (D) N, N Dimethyl-Formamide

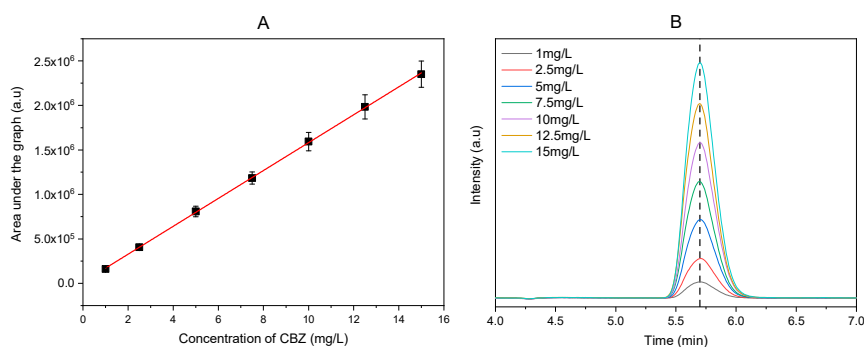

**Figure S2.** (A) Calibration curve & (B) Absorbance spectrum of CBZ by HPLC-DAD at 285nm wavelength

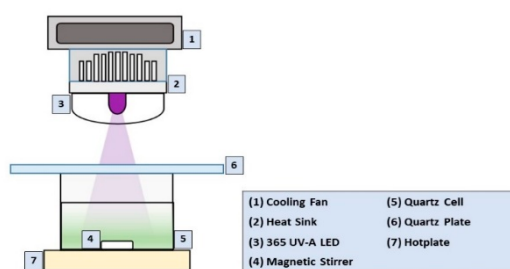

**Figure S3.** Schematic diagram of UV-A/LED photocatalytic setup

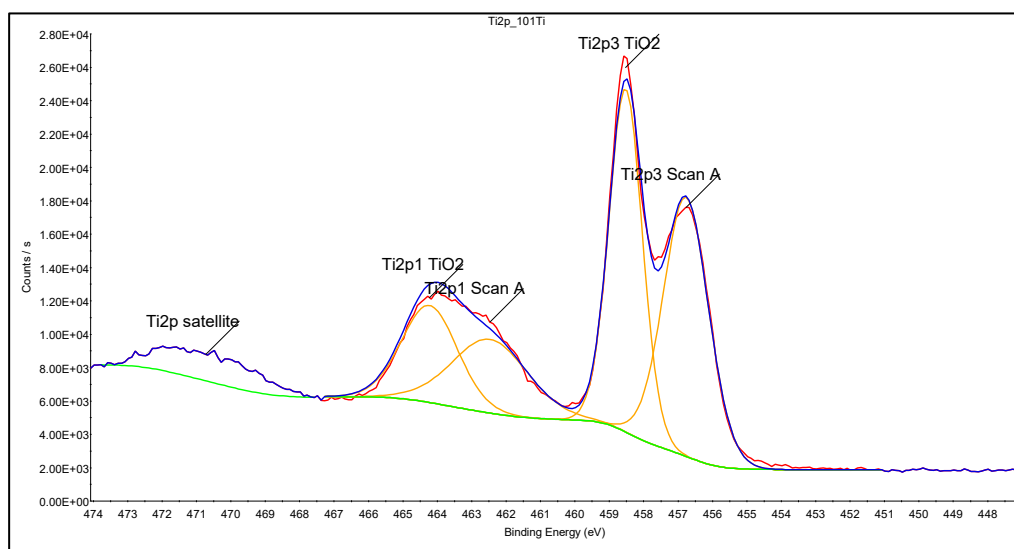

**Figure S4.** XPS patterns of MIL-101(Cr)@TiO<sub>2</sub> (Ti2p)

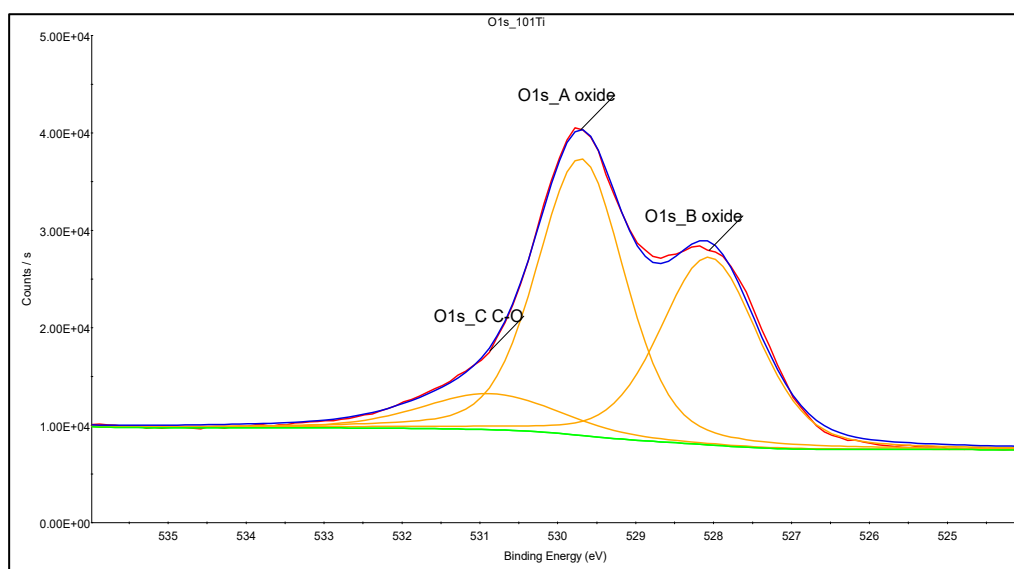

**Figure S5.** XPS patterns of MIL-101(Cr)@TiO<sub>2</sub> (O1s)

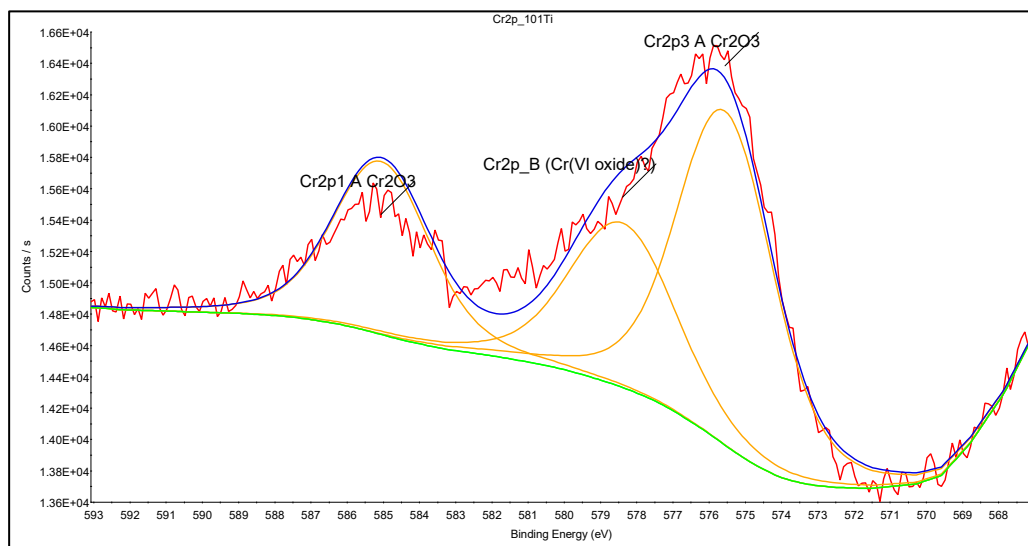

**Figure S6.** XPS patterns of MIL-101(Cr)@TiO<sub>2</sub> (Cr2p)

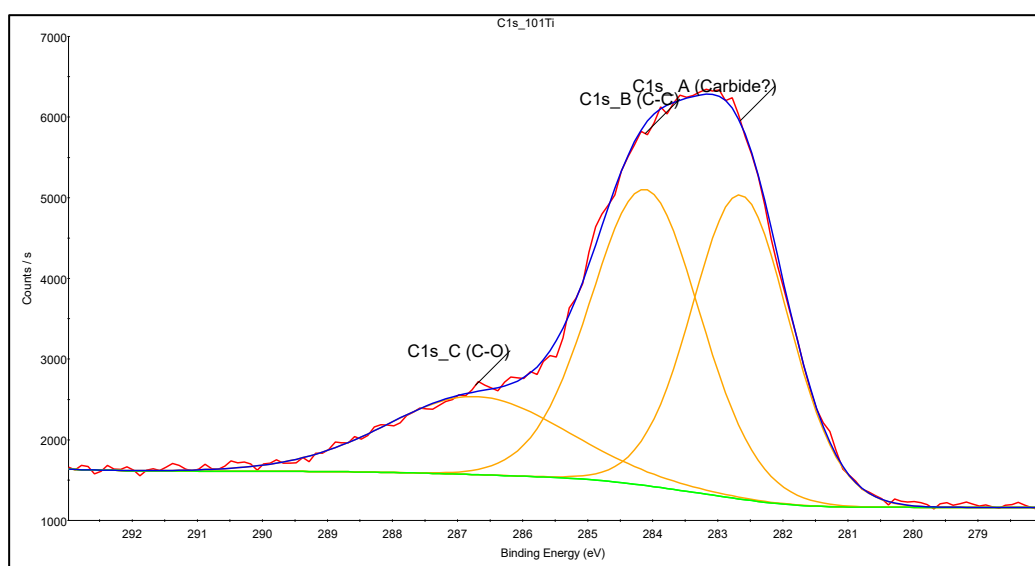

**Figure S7.** XPS patterns of MIL-101(Cr)@TiO<sub>2</sub> (C1s)

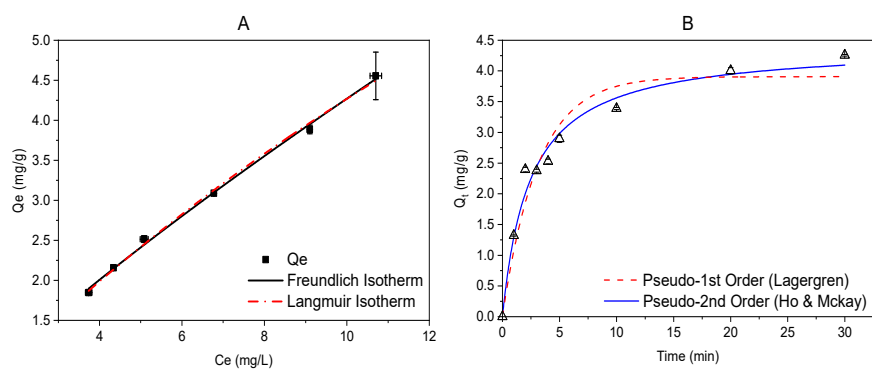

**Figure S8.** (A) Adsorption isotherms (B) Adsorption kinetics of CBZ on MIL-101(Cr)

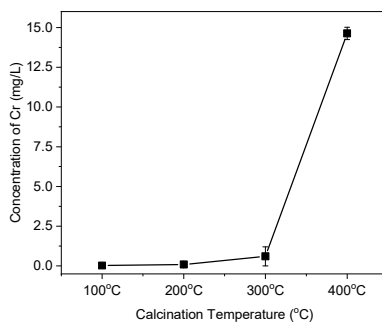

**Figure S9.** Determination of Cr concentration using ICP-OES

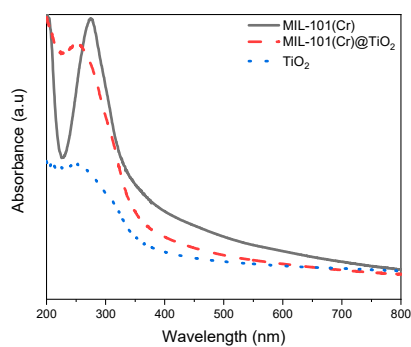

**Figure S10.** Absorbance spectra of MIL-101(Cr), MIL-101(Cr)@TiO<sub>2</sub> and TiO<sub>2</sub>

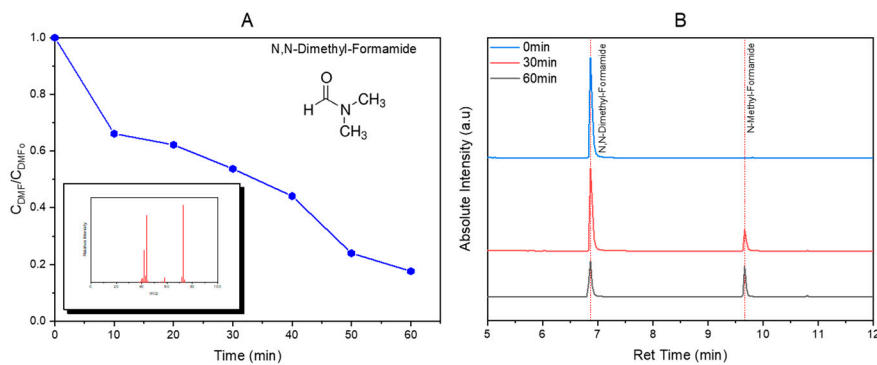

**Figure S11.** (A) Degradation of DMF using MIL-101(Cr)@TiO<sub>2</sub> with the corresponding MS Spectrum (B) GC/MS spectrum at different time intervals with presence of both DMF & N-Methyl-Formamide

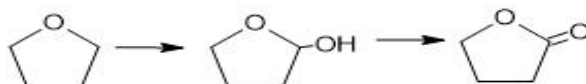

**Figure S12.** Transformation of tetrahydrofuran to 2-hydroxytetrahydrofuran to butyrolactone

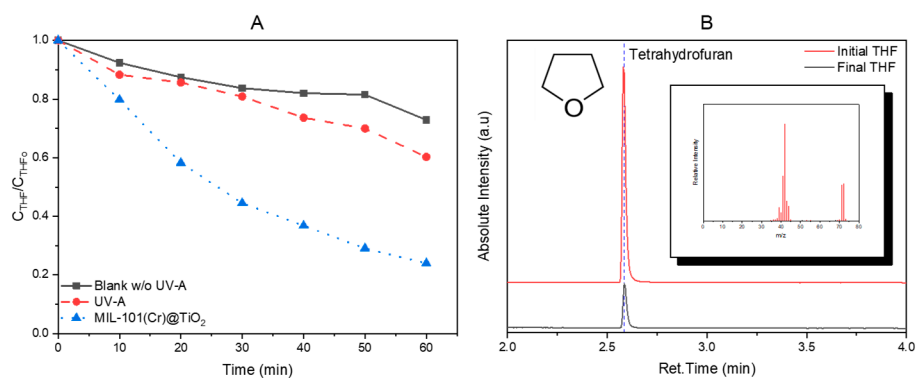

**Figure S13.** (A) Degradation of THF using MIL-101(Cr)@TiO<sub>2</sub> (B) GC/MS spectrum with the corresponding MS spectrum

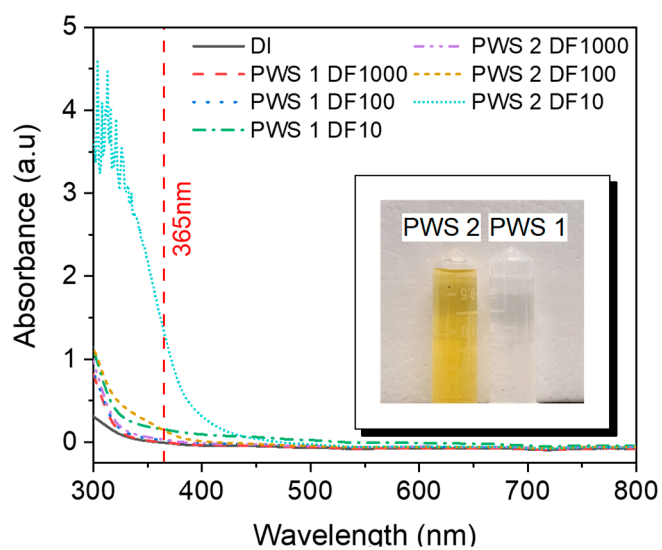

**Figure S14.** Absorbance spectrum of pharmaceutical wastewater samples PWS 1 & PWS 2 with different dilution factors

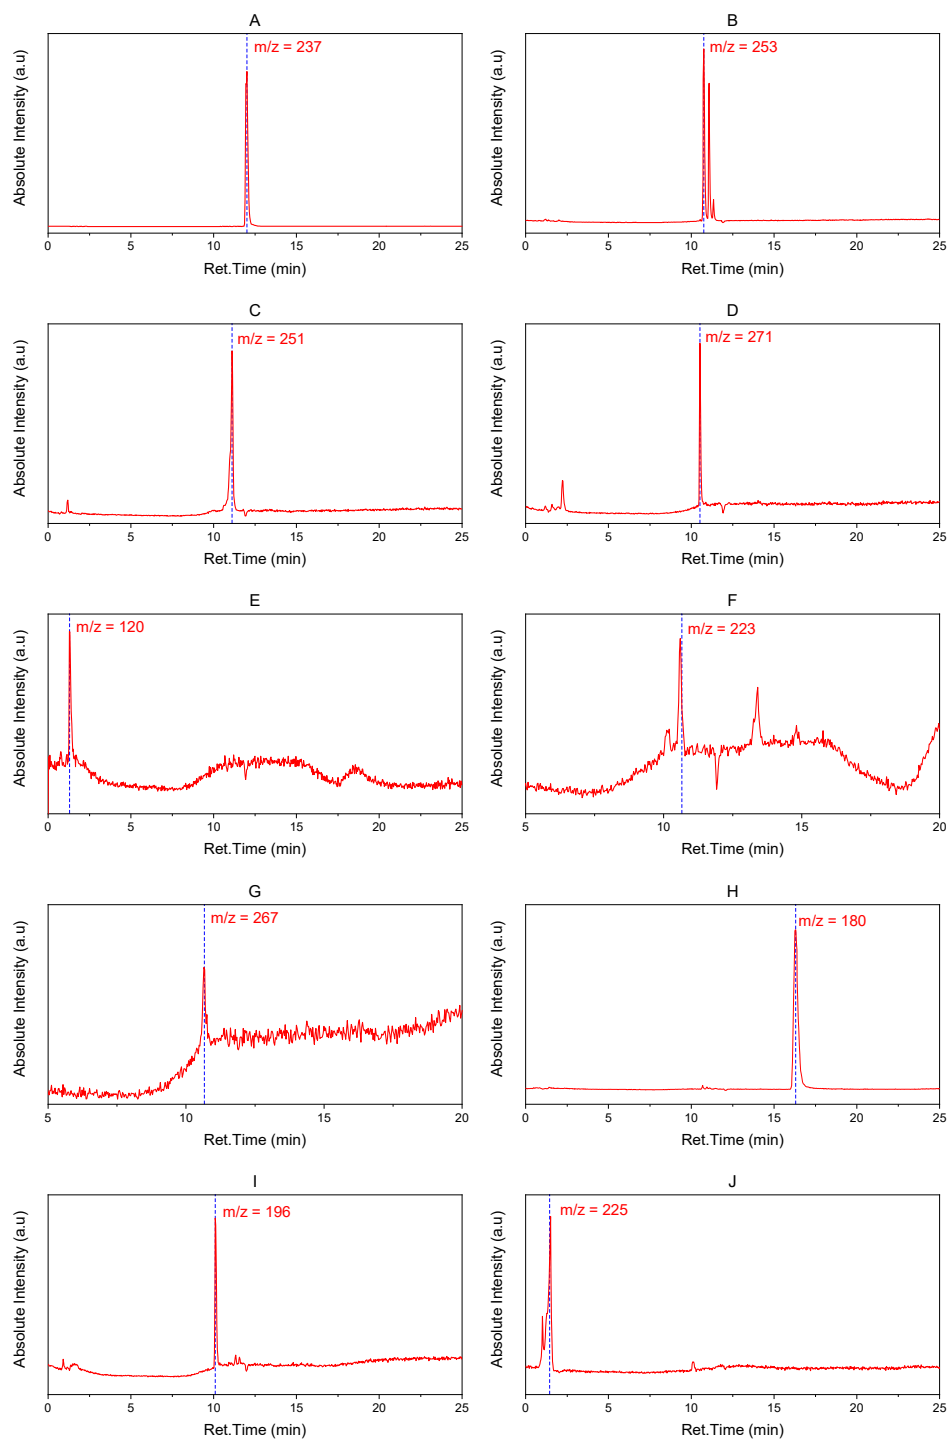

**Figure S15.** MS chromatography of CBZ & its intermediates: (A)  $m/z = 237$  (B)  $m/z = 253$  (C)  $m/z = 251$  (D)  $m/z = 271$  (E)  $m/z = 120$  (F)  $m/z = 223$  (G)  $m/z = 267$  (H)  $m/z = 180$  (I)  $m/z = 196$  (J)  $m/z = 225$



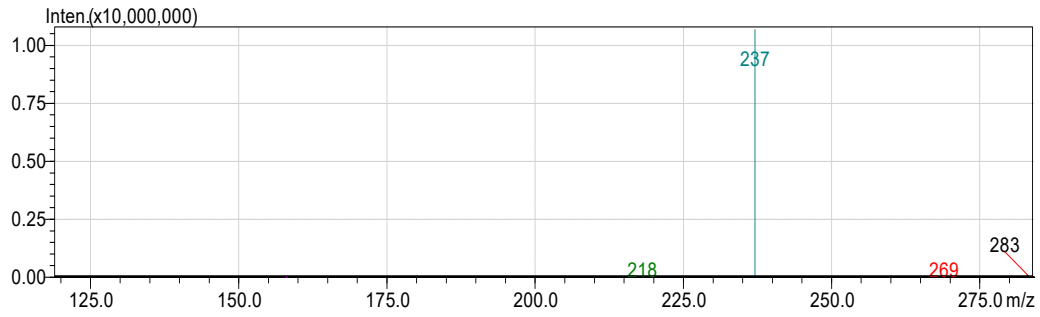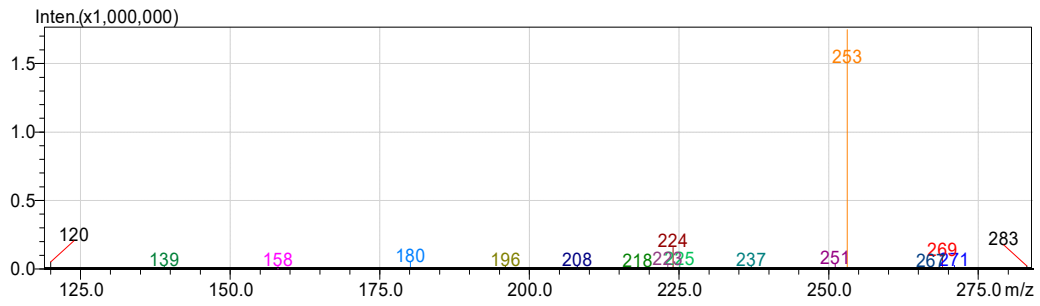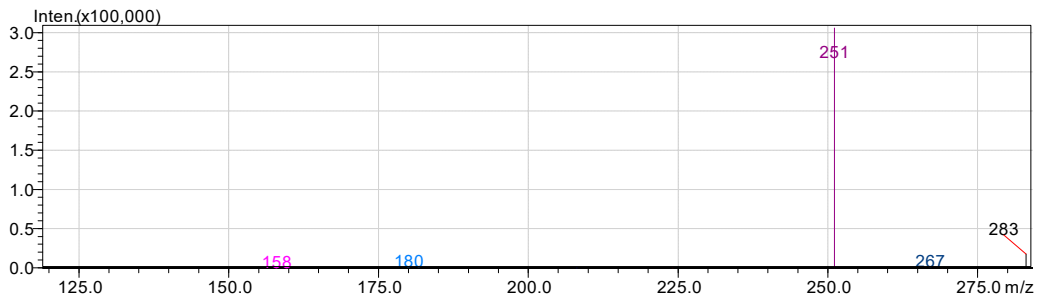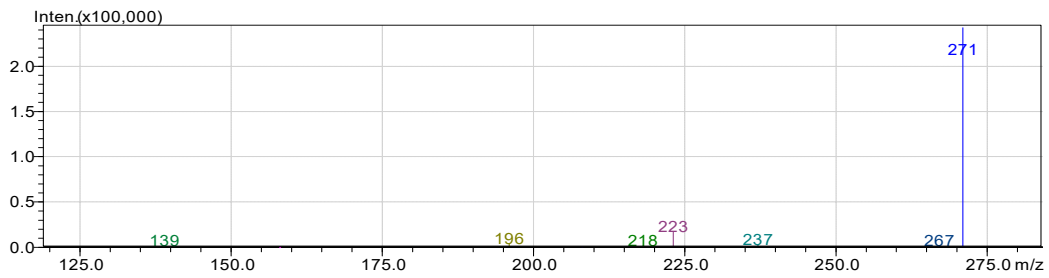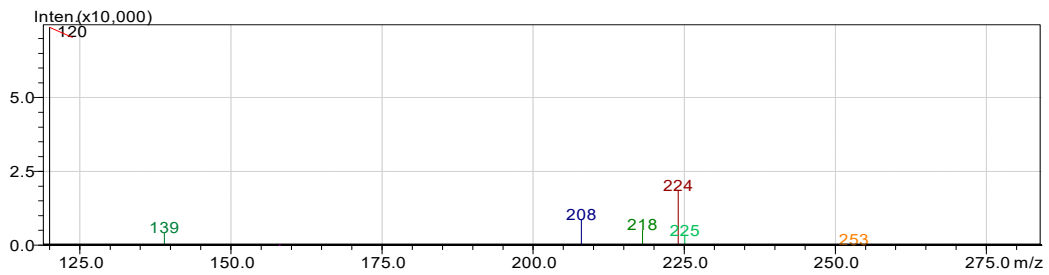

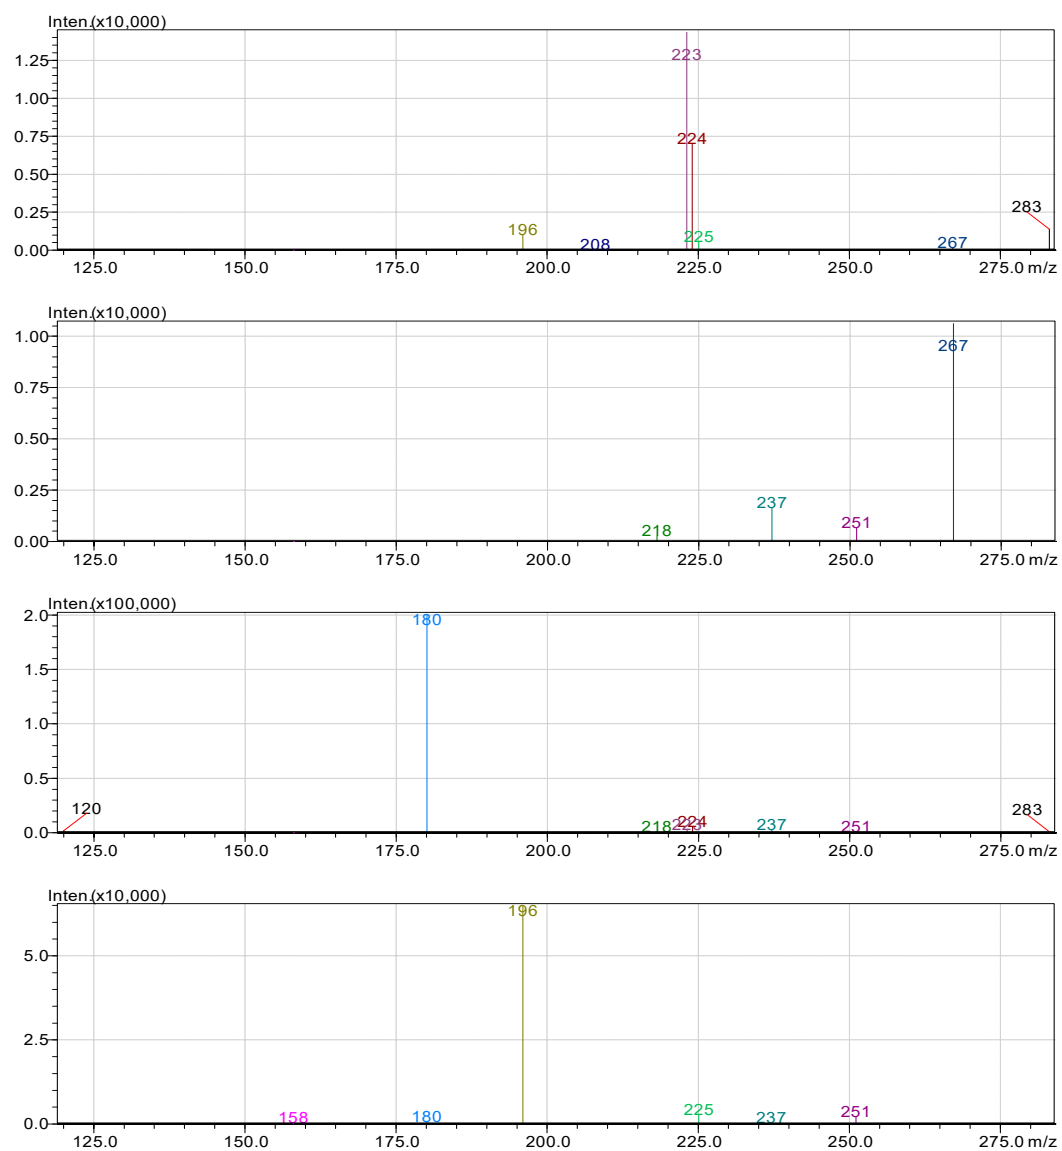

**Figure S16.** MS spectrum of CBZ and its intermediates

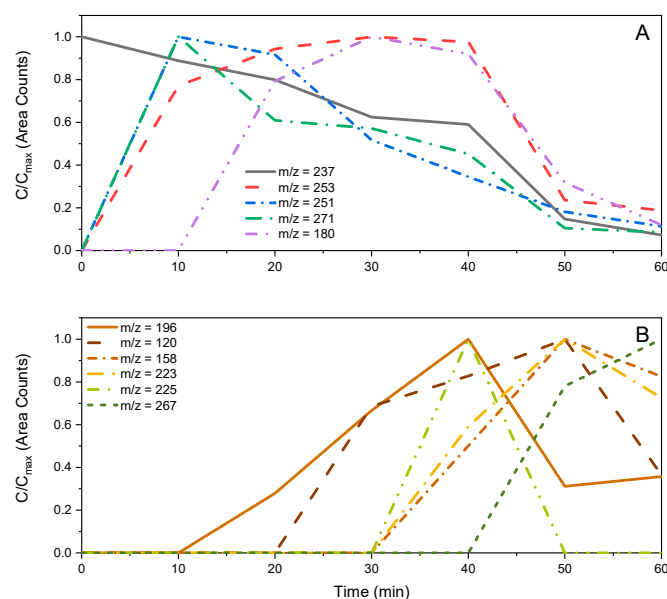

**Figure S17.** Time-profiles of CBZ intermediates for MIL-101(Cr)@TiO<sub>2</sub> composite with UV-A irradiation (Max-Normalized)

## References:

- [1] W.-J. Sim, J.-W. Lee, E.-S. Lee, S.-K. Shin, S.-R. Hwang, and J.-E. Oh, "Occurrence and distribution of pharmaceuticals in wastewater from households, livestock farms, hospitals and pharmaceutical manufactures," *Chemosphere*, vol. 82, no. 2, pp. 179–186, 2011.
- [2] Y. Lester, H. Mamane, I. Zucker, and D. Avisar, "Treating wastewater from a pharmaceutical formulation facility by biological process and ozone," *Water Res.*, vol. 47, no. 13, pp. 4349–4356, 2013.
- [3] K. Dwivedi, A. Morone, V. Pratape, T. Chakrabarti, and R. A. Pandey, "Carbamazepine and oxcarbazepine removal in pharmaceutical wastewater treatment plant using a mass balance approach: A case study," *Korean J. Chem. Eng.*, vol. 34, no. 10, pp. 2662–2671, 2017.
- [4] S. E. Page, W. A. Arnold, and K. McNeill, "Terephthalate as a probe for photochemically generated hydroxyl radical," *J. Environ. Monit.*, vol. 12, no. 9, pp. 1658–1665, 2010.
- [5] E. Finkelstein, G. M. Rosen, and E. J. Rauckman, "Spin trapping of superoxide and hydroxyl radical: practical aspects," *Arch. Biochem. Biophys.*, vol. 200, no. 1, pp. 1–16, 1980.
- [6] X. Hu, H. Dong, Y. Zhang, B. Fang, and W. Jiang, "Mechanism of N, N-dimethylformamide electrochemical oxidation using a Ti/RuO<sub>2</sub>-IrO<sub>2</sub> electrode," *RSC Adv.*, vol. 11, no. 13, pp. 7205–7213, 2021.
- [7] Y. Nosaka, S. Komori, K. Yawata, T. Hirakawa, and A. Y. Nosaka, "Photocatalytic

- OH radical formation in TiO<sub>2</sub> aqueous suspension studied by several detection methods,” *Phys. Chem. Chem. Phys.*, vol. 5, no. 20, pp. 4731–4735, 2003.
- [8] A. J. Stemmler and C. J. Burrows, “Guanine versus deoxyribose damage in DNA oxidation mediated by vanadium (IV) and vanadium (V) complexes,” *JBIC J. Biol. Inorg. Chem.*, vol. 6, no. 1, pp. 100–106, 2001.
- [9] M. S. Elovitz and U. von Gunten, “Hydroxyl radical/ozone ratios during ozonation processes. I. The Rct concept,” 1999.
- [10] R. E. Huie, C. L. Clifton, and P. Neta, “Electron transfer reaction rates and equilibria of the carbonate and sulfate radical anions,” *Int. J. Radiat. Appl. Instrum. Part C Radiat. Phys. Chem.*, vol. 38, no. 5, pp. 477–481, 1991.
- [11] L. Wojnárovits and E. Takács, “Rate constants of dichloride radical anion reactions with molecules of environmental interest in aqueous solution: A review,” *Environ. Sci. Pollut. Res.*, vol. 28, no. 31, pp. 41552–41575, 2021.
- [12] O. Augusto, M. G. Bonini, A. M. Amanso, E. Linares, C. C. Santos, and S. L. De Menezes, “Nitrogen dioxide and carbonate radical anion: two emerging radicals in biology,” *Free Radic. Biol. Med.*, vol. 32, no. 9, pp. 841–859, 2002.
